# Supplementary material for: Mechanism of the release and transformation of polyphenols during germination and fermentation in millets: profile and metabolomics based analysis
Source: Royal Society of Chemistry journal article supplement (doi:10.1039/d4fo05625f), 2025-01-01
Supplement: d4fo05625f1.pdf [file d4fo05625f1.pdf]

Table S1. Polyphenol relative contents in M, GM and FGM by UPLC-MS/MS

| Compounds                                           | Class I                  | Relative Content |             |             |
|-----------------------------------------------------|--------------------------|------------------|-------------|-------------|
|                                                     |                          | M                | GM          | FGM         |
| 1-O-Sinapoyl- $\beta$ -D-glucose                    | Phenolic acids           | 29951.47997      | 90679.808   | 39889.14911 |
| 2,3-Dihydroxybenzoic Acid*                          | Phenolic acids           | 504257.6561      | 1022422.143 | 5011606.644 |
| 2,5-Dihydroxybenzoic acid;<br>Gentisic Acid*        | Phenolic acids           | 181558.458       | 76782.6988  | 1022553.903 |
| 2-(Formylamino)benzoic acid                         | Phenolic acids           | 1656370.002      | 1929865.319 | 325371.6696 |
| 2-Hydroxy-3-phenylpropanoic acid                    | Phenolic acids           | 10917.94499      | 523833.9406 | 15073023.35 |
| 2-Hydroxybenzaldehyde<br>(Salicylaldehyde)          | Phenolic acids           | 15649.05489      | 36310.52375 | 53311.22217 |
| 2-Hydroxycinnamic acid*                             | Phenolic acids           | 19317016.02      | 21029786.72 | 3942835.954 |
| 2-Phenyloxirane                                     | Phenolic acids           | 347299.2403      | 41549806.94 | 31213898.63 |
| 3,4-Dihydrocoumarin                                 | Lignans and<br>Coumarins | 51368.60828      | 34903.46368 | 19255.3017  |
| 3,4-Dihydroxybenzoic acid<br>(Protocatechuic acid)* | Phenolic acids           | 386976.9941      | 226070.2531 | 1577641.647 |
| 3,5,7-Trihydroxyflavanone<br>(Pinobanksin)*         | Flavonoids               | 2994735.596      | 767683.2849 | 865643.7426 |
| 3-(4-Hydroxyphenyl)-propionic acid                  | Phenolic acids           | 129384.2779      | 413903.8845 | 11609628.85 |
| 3-Hydroxycinnamic Acid*                             | Phenolic acids           | 5297475.828      | 5182362.315 | 642757.4818 |
| 3-O-Acetylpinobanksin                               | Flavonoids               | 239531.2129      | 14292.97151 | 84072.18242 |
| 3-[(1-Carboxyvinyl)oxy]benzoic<br>acid              | Phenolic acids           | 70468.82657      | 293227.1301 | 825324.9406 |
| 3-hydroxyphenylacetic acid*                         | Phenolic acids           | 20424.9348       | 22281.34553 | 24137.06853 |
| 4-Hydroxybenzoic acid                               | Phenolic acids           | 3742036.029      | 4358313.873 | 3425044.74  |
| 4-Hydroxyphenylacetic acid*                         | Phenolic acids           | 20424.9348       | 22281.34553 | 24137.06853 |
| 5-O-p-Coumaroylquinic acid                          | Phenolic acids           | 445583.2387      | 446004.1928 | 44450.17    |
| 7-Hydroxycoumarin;Umbelliferone                     | Lignans and<br>Coumarins | 47109.87126      | 14349.81376 | 16189.30913 |
| Anthranilic Acid                                    | Phenolic acids           | 54329.59262      | 88331.67442 | 274361.9971 |
| Apigenin-6-C-glucoside<br>(Isovitexin)*             | Flavonoids               | 1069777.129      | 1037626.326 | 2871689.49  |
| Apigenin-7-O-<br>glucoside(Cosmosiin)*              | Flavonoids               | 500122.0134      | 114443.3076 | 166005.7126 |
| Apigenin-7-O-neohesperidoside<br>(Rhoifolin)*       | Flavonoids               | 61072.88328      | 113500.1896 | 83747.67125 |
| Apigenin-8-C-Glucoside (Vitexin)*                   | Flavonoids               | 1223801.238      | 1002113.501 | 3173181.277 |
| Apigenin; 4',5,7-<br>Trihydroxyflavone*             | Flavonoids               | 117597.3938      | 95639.82838 | 159456.5445 |
| Arbutin                                             | Phenolic acids           | 87699.22552      | 44682.76903 | 29469.28731 |
| Asperuloside                                        | Phenolic acids           | 41482.83754      | 100438.8378 | 251229.5468 |
| Benzoic acid                                        | Phenolic acids           | 136731.3601      | 148833.8661 | 487993.7425 |
| Caffeic acid                                        | Phenolic acids           | 108243.4804      | 221562.5642 | 136289.7817 |

|                                                      |                       |             |             |             |
|------------------------------------------------------|-----------------------|-------------|-------------|-------------|
| Caffeic aldehyde                                     | Phenolic acids        | 4248009.723 | 4465368.917 | 712003.1992 |
| Chlorogenic acid (3-O-Caffeoylquinic acid)*          | Phenolic acids        | 232169.6116 | 65580.21817 | 97589.96724 |
| Cinnamic acid                                        | Phenolic acids        | 84762.8238  | 3929154.553 | 197058.1386 |
| Coniferyl alcohol                                    | Phenolic acids        | 30601.57222 | 49808.50525 | 144143.9869 |
| Eriodictyol (5,7,3',4'-Tetrahydroxyflavanone)        | Flavonoids            | 53276.43005 | 19066.00925 | 34282.1027  |
| Eugenol                                              | Phenolic acids        | 2001661.604 | 2100901.657 | 313474.2413 |
| Ferulic acid*                                        | Phenolic acids        | 2812457.777 | 7863336.271 | 3738790.589 |
| Galangin (3,5,7-Trihydroxyflavone)                   | Flavonoids            | 444586.0493 | 405037.6006 | 497888.2179 |
| Genistein*                                           | Flavonoids            | 101280.6397 | 89502.96234 | 136158.0948 |
| Hesperetin                                           | Flavonoids            | 132716.0684 | 37650.33603 | 57474.96596 |
| Hesperetin-7-O-glucoside                             | Flavonoids            | 111281.1988 | 24628.35272 | 19541.43187 |
| Homoeriodictyol                                      | Flavonoids            | 209826.5851 | 63349.55197 | 93928.69698 |
| Hydrocinnamic acid                                   | Phenolic acids        | 9009.715344 | 33552.41456 | 608521.2315 |
| Isosakuranetin (5,7-Dihydroxy-4'-methoxyflavanone)   | Flavonoids            | 9711.006589 | 8746.019143 | 11067.39319 |
| Kaempferol-3-O-galactoside (Trifolin)*               | Flavonoids            | 461210.4106 | 11790.80567 | 10488.51055 |
| Kaempferol-3-O-glucoside (Astragalin)*               | Flavonoids            | 216752.1943 | 60993.85037 | 33537.7316  |
| Luteolin (5,7,3',4'-Tetrahydroxyflavone)             | Flavonoids            | 64855.20417 | 23261.2695  | 29327.52681 |
| Luteolin-7-O-glucoside (Cynaroside)*                 | Flavonoids            | 612174.5344 | 276339.3835 | 12296.00472 |
| Luteolin-7-O-glucuronide                             | Flavonoids            | 8341.295167 | 59121.92722 | 47707.46249 |
| Matairesinol                                         | Lignans and Coumarins | 21352.42379 | 26055.23589 | 166211.4533 |
| Naringenin (5,7,4'-Trihydroxyflavanone)*             | Flavonoids            | 3258460.179 | 758144.5858 | 811957.5125 |
| Naringenin chalcone; 2',4,4',6'-Tetrahydroxychalcone | Flavonoids            | 1948297.089 | 405695.7283 | 519889.398  |
| Naringenin-7-O-glucoside (Prunin)*                   | Flavonoids            | 45673.69975 | 13966.1733  | 14478.01133 |
| Phthalic acid                                        | Phenolic acids        | 57106.33512 | 292144.7753 | 266709.6002 |
| Pinocembrin (Dihydrochrysin)                         | Flavonoids            | 11096.50716 | 15592.02219 | 4878.121795 |
| Pinoresinol*                                         | Lignans and Coumarins | 289672.1205 | 88799.02489 | 251325.7133 |
| Podophyllotoxin                                      | Lignans and Coumarins | 374533.1768 | 302511.0876 | 207679.3129 |
| Pyrocatechol                                         | Phenolic acids        | 47661.63594 | 43732.8688  | 84675.88187 |
| Quercetin-3-O-glucoside (Isoquercitrin)              | Flavonoids            | 94120.58193 | 6633.808472 | 13253.23103 |
| Quercetin-3-O-rutinoside (Rutin)                     | Flavonoids            | 111134.9953 | 13044.20183 | 36265.77591 |
| Salidroside                                          | Phenolic acids        | 200080.7393 | 689753.31   | 94964.68626 |

|                                                          |                |             |             |             |
|----------------------------------------------------------|----------------|-------------|-------------|-------------|
| Sinapic acid                                             | Phenolic acids | 20757.69642 | 218740.2043 | 147843.564  |
| Sinapinaldehyde                                          | Phenolic acids | 608550.8822 | 438100.9455 | 342516.5035 |
| Sinapoyl malate                                          | Phenolic acids | 89306.40956 | 126540.0998 | 78730.19545 |
| Syringetin; 3,5,7,4'-Tetrahydroxy-3',5'-dimethoxyflavone | Flavonoids     | 36904.74587 | 24580.36217 | 23725.81383 |
| Terephthalic acid*                                       | Phenolic acids | 430529.9616 | 2523337.663 | 2828667.868 |
| Trans-5-O-(p-Coumaroyl)shikimate                         | Phenolic acids | 103753.6555 | 1019238.094 | 190278.9745 |
| Tyrosol; 4-Hydroxyphenylethanol                          | Phenolic acids | 12888.99368 | 26064.77433 | 113897.6837 |
| Vitexin-2"-O-glucoside                                   | Flavonoids     | 1315365.707 | 282788.9985 | 210278.8184 |
| Vitexin-2"-O-rhamnoside                                  | Flavonoids     | 73374.17783 | 112526.2765 | 96363.88427 |
| p-Coumaric acid                                          | Phenolic acids | 3959737.937 | 3508830.7   | 509647.5204 |
| p-Coumaryl alcohol                                       | Phenolic acids | 86654.5524  | 168132.2779 | 591936.2001 |
| $\alpha$ -Hydroxycinnamic Acid*                          | Phenolic acids | 5297475.828 | 5182362.315 | 642757.4818 |

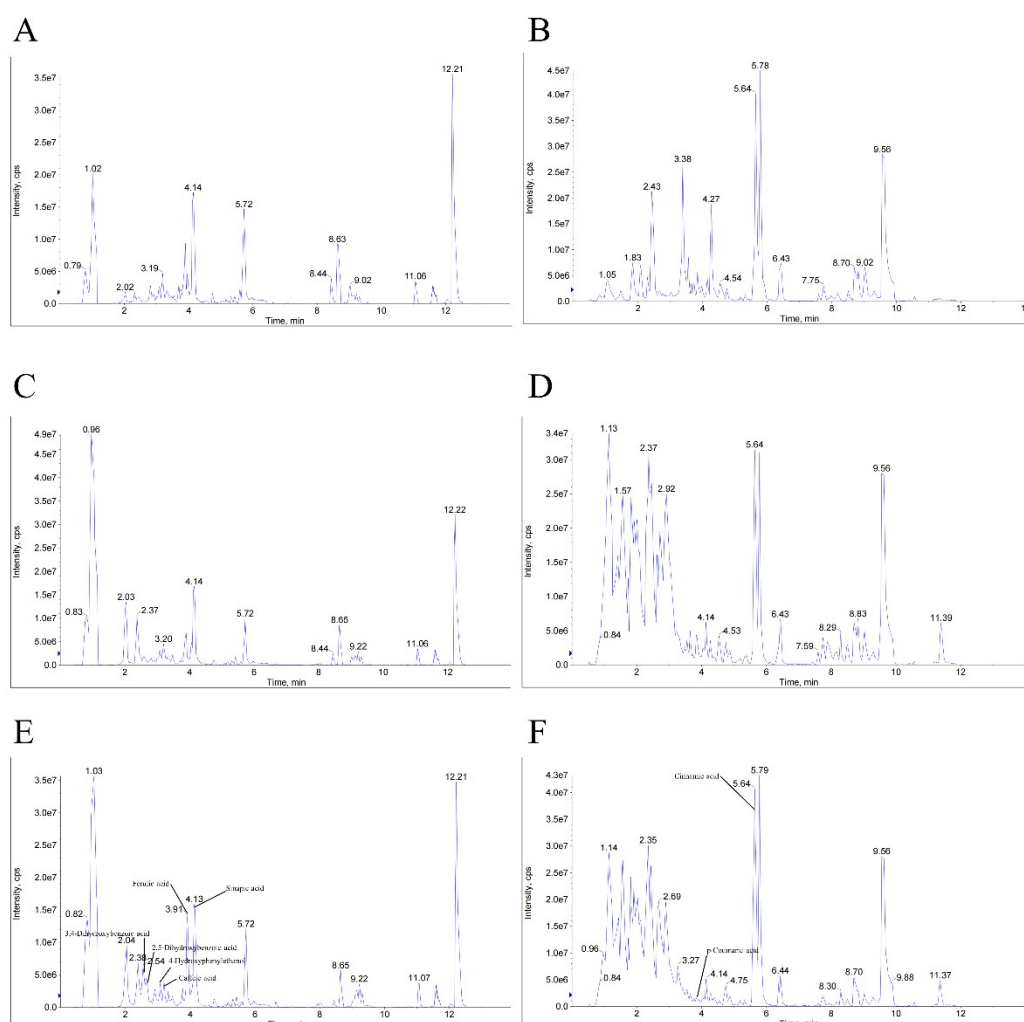

**Figure S1.** Total ion chromatograms of M-n (A) M-p (B), GM-n (C), GM-p (D), FGM-n (E), and FGM-p (F). N represents the negative ion mode and p represents the positive ion mode.

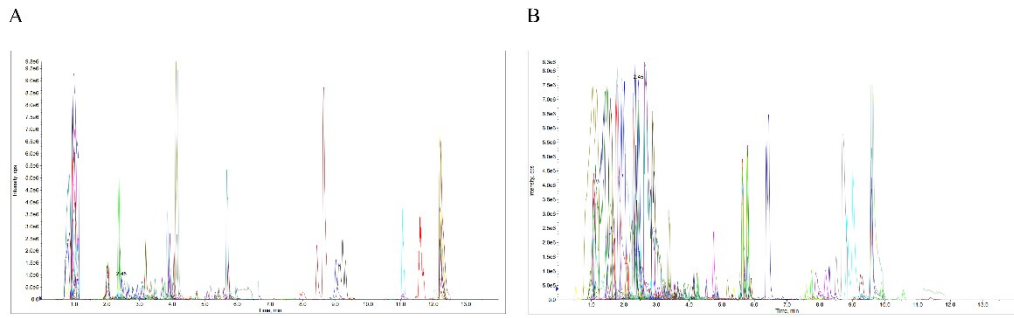

**Figure S2.** Multimodal map of MRM metabolite detection of mix samples-n (A) and mix samples -p (B). N represents the negative ion mode and p represents the positive ion mode. Different colors represent different metabolites.

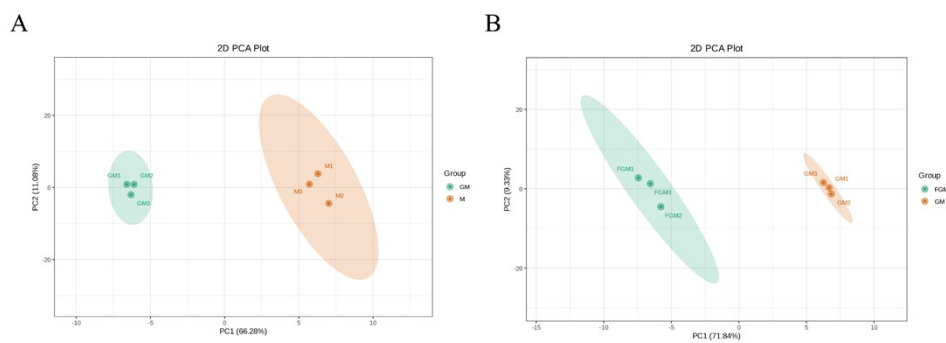

**Figure S3.** Principal component analysis (PCA) of different millet samples after germination and fermentation. (A) The PCA between GM and M. (B) The PCA between FGM and GM.

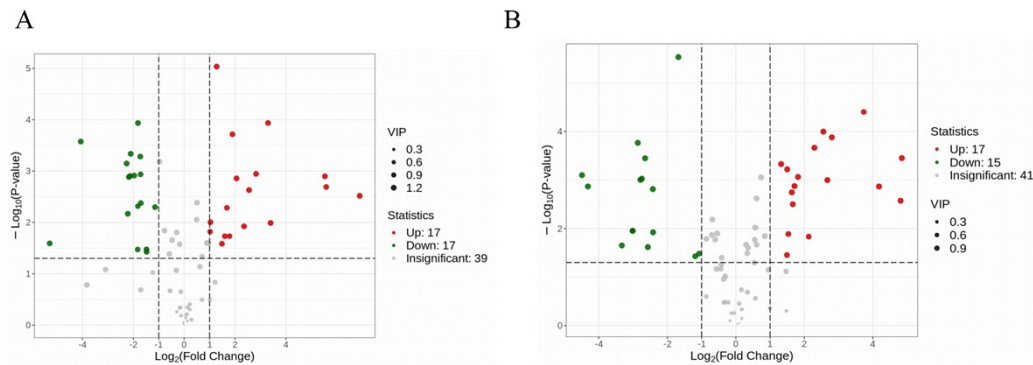

**Figure S4.** Volcanic map of metabolites after germination and fermentation. (A) The differentiated metabolites between GM and M. (B) The differentiated metabolites between FGM and GM.

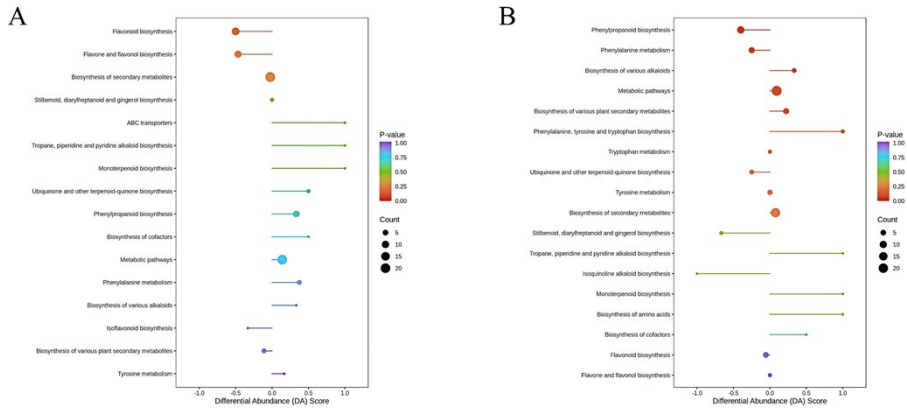

**Figure S5.** Affected metabolic pathways after germination (A) and fermentation (B) in millets based on KEGG database.
